# Supplementary material for: Genotype × Environment Studies on Resistance to Late Leaf Spot and Rust in Genomic Selection Training Population of Peanut (Arachis hypogaea L.)
Source: Front Plant Sci. 2019 Dec 4;10:1338. doi: 10.3389/fpls.2019.01338 (PMC6904303; doi:10.3389/fpls.2019.01338)
Supplement: Supplementary file 2 [file Table_2.xlsx]

## Sheet: Supplimentary Table 2
Supplementary Table 2. List of resistant genotypes with pedigree details, source of resistance, mean disease scores for late leaf spot and rust along with pod yield and days to maturity across the environments.
S. No	Genotype	Source of resistance	Pedigree	Market type	LLS90	LLS105	Rust90	Rust105	DM (days)	PYH (kg)	Resistant to
1	ICGV 06423	A. cardenasii	(((((((F 334 A-B-14 x NC Ac 2214) F2-B1-B3-B2-B3-B2-B3) x ICG 2241) F2-B3-B1-B1-B2SB-B1SB-B2-B1SB) x ((ICGMS 42 x Kadiri 3) F2-B1-B2-B2-B2-B1-B1-B1)) F2-SSD-B3NI-B1-B1-P2-B1-B1) x ((((FESR 13-P14-B1-B2-B1-B1 x Chico) F2-B3-B1-B3-B1-B1-B1) x ((CS 9 x ICGS 5) F2-B1-B2-B2-B1)) F2-P29-B1-B1-B1-B1-B1-B1-B1)) F2-P3-P2-B1-B4-B1-B1-B1-B1-B1	Spanish Bunch	3.66667	6	2.66667	4.33333	131.5	2516.38	Rust
2	ICGV 07247	A. cardenasii	[(((((ICGS 35 x NC Ac 1705) F2-B2-B1-B1-B3-B2) x (CS 16-B2-B2)) F2-B4-P1-B1-B1VB-B3VB-B1-B1VB) x ((NC Ac 343 x ((Dh. 3-20 x Robut 33-1) F2-P5-B1-B1-EB2-B1-B1-B1-B1-B1-B1-B1)) F2-B2-B1-B1-B1-B1-B1-B2-B1))SIL 4 x (ICGS 44 x ICGS 76)] F2-SSD-SSD-P12-B1-B1-B1	Virginia Bunch	4.66667	6.66667	3	5.33333	120	3202.87	Rust
3	ICGV 03064	A. cardenasii	(((((((F 334 A-B-14 x NC Ac 2214) F2-B1-B3-B2-B3-B2-B3) x ICG 2241) F2-B3-B1-B1-B2SB-B1SB-B2-B1SB) x ((ICGMS 42 x Kadiri 3) F2-B1-B2-B2-B2-B1-B1-B1)) F2-SSD-B3NI-B1-B1-P2-B1-B1) x ((((FESR 13-P14-B1-B2-B1-B1 x Chico) F2-B3-B1-B3-B1-B1-B1) x ((CS 9 x ICGS 5) F2-B1-B2-B2-B1)) F2-P29-B1-B1-B1-B1-B1-B1-B1)) F2-B3-P9-B1-B2-B1	Spanish Bunch	4	6.66667	3	5.33333	122.88	3040.71	Rust
4	ICGV 05163	A. cardenasii	(((((((F 334 A-B-14 x NC Ac 2214) F2-B1-B3-B2-B3-B2-B3) x ICG 2241) F2-B3-B1-B1-B2SB-B1SB-B2-B1SB) x ((ICGMS 42 x Kadiri 3) F2-B1-B2-B2-B2-B1-B1-B1)) F2-SSD-B3NI-B1-B1-P2-B1-B1) x ((((FESR 13-P14-B1-B2-B1-B1 x Chico) F2-B3-B1-B3-B1-B1-B1) x ((CS 9 x ICGS 5) F2-B1-B2-B2-B1)) F2-P29-B1-B1-B1-B1-B1-B1-B1)) F2-B3-P10-B1-B3-B1-B1-B1-B1-B1-B1	Spanish Bunch	3	6.33333	3	5.33333	121	2978.01	LLS and Rust
5	ICGV 06422	A. cardenasii	(((((((F 334 A-B-14 x NC Ac 2214) F2-B1-B3-B2-B3-B2-B3) x ICG 2241) F2-B3-B1-B1-B2SB-B1SB-B2-B1SB) x ((ICGMS 42 x Kadiri 3) F2-B1-B2-B2-B2-B1-B1-B1)) F2-SSD-B3NI-B1-B1-P2-B1-B1) x ((((FESR 13-P14-B1-B2-B1-B1 x Chico) F2-B3-B1-B3-B1-B1-B1) x ((CS 9 x ICGS 5) F2-B1-B2-B2-B1)) F2-P29-B1-B1-B1-B1-B1-B1-B1)) F2-P3-P2-B1-B4-B1-B1-B1-B1-B1	Spanish Bunch	3.66667	5.66667	2.33333	3.66667	132.88	2460.73	Rust
6	ICGV 07220	A. cardenasii	[(((((ICGS 35 x NC Ac 1705) F2-B2-B1-B1-B3-B2) x (CS 16-B2-B2)) F2-B4-P1-B1-B1VB-B3VB-B1-B1VB) x ((NC Ac 343 x ((Dh. 3-20 x Robut 33-1) F2-P5-B1-B1-EB2-B1-B1-B1-B1-B1-B1-B1)) F2-B2-B1-B1-B1-B1-B1-B2-B1))SIL 4 x (ICGS 44 x ICGS 76)] F2-SSD-SSD-P5-B1-B1-B1	Spanish Bunch	3.33333	5.33333	3	4.66667	131.88	1274.6	Rust
7	ICGV 07223	A. cardenasii	[(((((ICGS 35 x NC Ac 1705) F2-B2-B1-B1-B3-B2) x (CS 16-B2-B2)) F2-B4-P1-B1-B1VB-B3VB-B1-B1VB) x ((NC Ac 343 x ((Dh. 3-20 x Robut 33-1) F2-P5-B1-B1-EB2-B1-B1-B1-B1-B1-B1-B1)) F2-B2-B1-B1-B1-B1-B1-B2-B1))SIL 4 x (ICGS 44 x ICGS 76)] F2-SSD-SSD-P22-B1-B1-B1	Spanish Bunch	4	6.33333	2.33333	5	120.63	2747.16	Rust
8	ICGV 07227	A. cardenasii	[(((((ICGS 35 x NC Ac 1705) F2-B2-B1-B1-B3-B2) x (CS 16-B2-B2)) F2-B4-P1-B1-B1VB-B3VB-B1-B1VB) x ((NC Ac 343 x ((Dh. 3-20 x Robut 33-1) F2-P5-B1-B1-EB2-B1-B1-B1-B1-B1-B1-B1)) F2-B2-B1-B1-B1-B1-B1-B2-B1)) x ((((Dh. 3-20 x Robut 33-1) F2-P5-B1-B1-EB2-B1-B1-B1-B1-B1-B1-B1) x ((Robut 33-1 x CS 9) F2-B2-B1-B1-B1)) F2-SSD-SSD-P13-B1-B1-B1-B1-B1-B1-B1-B1-B1-B1-B1)] F2-SSD-SSD-P13-B1-B1-B1	Spanish Bunch	5	7	3	5.33333	119.38	2207.01	Rust
9	ICGV 07235	A. cardenasii	[(((((ICGS 35 x NC Ac 1705) F2-B2-B1-B1-B3-B2) x (CS 16-B2-B2)) F2-B4-P1-B1-B1VB-B3VB-B1-B1VB) x ((NC Ac 343 x ((Dh. 3-20 x Robut 33-1) F2-P5-B1-B1-EB2-B1-B1-B1-B1-B1-B1-B1)) F2-B2-B1-B1-B1-B1-B1-B2-B1))SIL 4 x ((((Dh. 3-20 x Robut 33-1) F2-P5-B1-B1-EB2-B1-B1-B1-B1-B1-B1-B1) x ((Robut 33-1 x CS 9) F2-B2-B1-B1-B1)) F2-SSD-SSD-P13-B1-B1-B1-B1-B1-B1-B1-B1-B1-B1-B1)] F2-SSD-SSD-P23-B1-B1-B1	Spanish Bunch	3	6	2.33333	5	126.25	2667.86	LLS and Rust
10	ICGV 99029	A. cardenasii	(([(J 11 x CS 52) x (((Robut 33-1-1-5 B1-B1-B1-B1-B1-B1-B1-B1-B1-B1)x TG 2E) F2-B1-B2-B1)] F2-B1-B1-B1-B2-B1-B1) x ((((Chico x JL 24) P5-B1-B1-B1-B1) x Sinpulangkong) F2-B1-P1-P1-B1-B1-B1)) F2-P12-B1-B1-B1	Spanish Bunch	3.66667	5	3	4	132.75	1992.58	Rust
11	ICGV 00191	A. cardenasii	(([(J 11 x CS 52) x ((ICGS 44 x TG 2E) F2-B1-B2-B1)] F2-B1-B1-B1-B2-B1-B1) x ((([ICGS 30 x (TMV 10 x Chico) F6] P23-B1-B1-B1) x ([(Shulamit x Chico) x PI 337409] F2-B2-B1-B2-B1-B1-B1-B1)) F2-B1-B1-B1-B2-B1-B1)) F2-P25-B1-B1-B1-P1-B1(SB)	Spanish Bunch	3.66667	5	3	4	131.5	2003.71	Rust
12	ICGV 07120	A. cardenasii	[{[(86187x86350)x(Florix17090)]x(Dh.3-20xPI259747)} x [((Robut 33-1 x NC Ac 316) F2-B2-B1-B1-NIB1-B1-B1-B1-B1-B1-B1-B1) x ((Robut 33-1 x CS 9) F2-B2-B1-B1-B1))x((((Dh. 3-20 x USA 20) F2-P1-B1-B1-B1-B1-B1-B1-B1-B1-B1-B1-B1-B1-B1-B1-B1) x ((Robut 33-1 x NC Ac 2821) F2-B1-B1)) F2-SSD-B1-B2-B1SB-B1SB-B1-B1SB)]] F2-B1-SSD-P8-B1-B1-B1	Spanish Bunch	3.33333	4.33333	2.66667	4	132.38	2602.11	Rust
13	ICGV 00005	A. cardenasii	(((((M 13 x NC Ac 2214) F2-B2-B3-B2-B3-B2) x ((F 334 A-B-14 x NC Ac 2214) F2-B1-B3-B2-B3-B2-B3)) F2-B1-B2-B3-B2-B6-B1) x ((A. hypogaea x A. cardenasii) CS 9)) F2-B1-B1-B1-B1-B2-B1-B1-B1-B1-B1(SB)	Spanish Bunch	4	6.33333	3	5	117.5	2053.46	Rust
14	ICGV 01273	A. cardenasii	(((((ICGS 35 x NC Ac 1705) F2-B2-B1-B1-B3-B2) x (CS 16-B2-B2)) F2-B4-P1-B1-B1VB-B3VB-B1-B1VB) x ((NC Ac 343 x ((Dh. 3-20 x Robut 33-1) F2-P5-B1-B1-EB2-B1-B1-B1-B1-B1-B1-B1)) F2-B2-B1-B1-B1-B1-B1-B2-B1)) F2-SSD-B3-B1-B2-B3-B1-B1-B1-B1-B2-B1	Spanish Bunch	3.33333	6.33333	2.66667	5	115	2499.69	Rust
15	ICGV 01274	A. cardenasii	(((((ICGS 35 x NC Ac 1705) F2-B2-B1-B1-B3-B2) x (CS 16-B2-B2)) F2-B4-P1-B1-B1VB-B3VB-B1-B1VB) x ((NC Ac 343 x ((Dh. 3-20 x Robut 33-1) F2-P5-B1-B1-EB2-B1-B1-B1-B1-B1-B1-B1)) F2-B2-B1-B1-B1-B1-B1-B2-B1)) F2-SSD-B3-B1-B2-B3-B1-B1-B1-B2-B1-B1	Spanish Bunch	3	5	2.66667	5	117.88	2677.73	LLS and Rust
16	ICGV 03043	A. hypogaea	(((([ICGS 30 x (MH 2 x Var. 28-206)] P11-B1-B1-B2-B1) x ((91176 x TG 2E) P1-B1-B1-B1-B2)) F2-P8-P1-B1-B1-B1-B1-B1-B1-B1-B1) x YUE YOU 92) F2-SSD-SSD-B3-B1-B1	Spanish Bunch	3	4.33333	2.66667	3	131.5	2547.26	LLS and Rust
17	ICGV 99085	A. cardenasii	(((((Robut 33-1 x NC Ac 2698) F2-B2-B1-B1-B1-B1-B1-B1-B1-B1-B1-B1-B1) x CS 30-1) F2-B1-B2-B1-B2-B2-B3-B3) x ICG 8666) F2-B1-B1-B2-B1-B1-B1-B1	Spanish Bunch	3.66667	5.66667	3	5.33333	129.63	1434.2	Rust
18	GPBD 4	A. cardenasii	(KRG1 x ICGV 86855)	Spanish Bunch	2.33333	4	2.33333	3.33333	130.38	1647.26	LLS and Rust
19	ICGV 03042	A. hypogaea	(((([ICGS 30 x (MH 2 x Var. 28-206)] P11-B1-B1-B2-B1) x ((91176 x TG 2E) P1-B1-B1-B1-B2)) F2-P8-P1-B1-B1-B1-B1-B1-B1-B1-B1) x YUE YOU 92) F2-SSD-SSD-B1-B1-B1	Spanish Bunch	3.33333	6	2.66667	5	121	2622.11	Rust
20	ICGV 05100	A. cardenasii	{([Robut 33-1 x NC Ac 316) F13 x Robut 33-1 x CS 9) F6] x Robut 33-1 x NC Ac 2214) F6 x Cyto 213-2 F6]} F2-SSD-B1-B1-B1-B2-B2-B3	Spanish Bunch	3	5	2.33333	4	131.5	1784.25	LLS and Rust
21	ICGV 06424	A. cardenasii	(((((((F 334 A-B-14 x NC Ac 2214) F2-B1-B3-B2-B3-B2-B3) x ICG 2241) F2-B3-B1-B1-B2SB-B1SB-B2-B1SB) x ((ICGMS 42 x Kadiri 3) F2-B1-B2-B2-B2-B1-B1-B1)) F2-SSD-B3NI-B1-B1-P2-B1-B1) x ((((FESR 13-P14-B1-B2-B1-B1 x Chico) F2-B3-B1-B3-B1-B1-B1) x ((CS 9 x ICGS 5) F2-B1-B2-B2-B1)) F2-P29-B1-B1-B1-B1-B1-B1-B1)) F2-P3-P2-B1-B4-B1-B1-B1-B1-B2	Spanish Bunch	4	5.66667	2.66667	4.33333	114.13	1766.38	Rust
22	ICGV 07145	A. hypogaea	(([(((Robut 33-1 x L.No. 95-A) F2-B1-B1-B1-B1-B1-B1-B1) x ((Manfredi x M 13))) x Kadiri 134] F2-SSD-SSD-B1-B1-B1) x ((J 11 x ((Faizpur 1-5 x UF 71513-1) F2-B1-B2-B1-B1)) F2-B1-B1-B1-B1-B1-B1)) F2-P3-P8-B1-B1-B1-B1-B1	Spanish Bunch	4	6.33333	2.66667	5.33333	130.88	1818.46	Rust
23	ICGV 06142	A. cardenasii	[(((((ICGS 35 x NC Ac 1705) F2-B2-B1-B1-B3-B2) x (CS 16-B2-B2)) F2-B4-P1-B1-B1VB-B3VB-B1-B1VB) x ((NC Ac 343 x ((Dh. 3-20 x Robut 33-1) F2-P5-B1-B1-EB2-B1-B1-B1-B1-B1-B1-B1)) F2-B2-B1-B1-B1-B1-B1-B2-B1)) x (((((Comet x NC Ac 17090) F2-B2-B1-B2-B1-B1-B1-B2) x ([ICGS 17 x (TMV 10 x Chico)] F2-B1-B1-B2-B1-B1-B1)) F2-B1-SSD-B1-B1-B1-B1-B1) x 92 R/75)] F2-SSD-SSD-P8-B2-B1-B1	Spanish Bunch	2.66667	4.66667	2.33333	4.33333	132.88	2677.34	LLS and Rust
24	49 M-16	A. hypogaea	TG 49 × M 28-2	Spanish Bunch	3	5	2.33333	4	132	2525.89	LLS and Rust
25	49 × 39-74	A. cardenasii	GPBD 4 × TG 49	Spanish Bunch	3.66667	6	3	6.33333	111	1711.22	Rust
26	39 × 49-81-1	A. cardenasii	TG 49 × GPBD 4	Spanish Bunch	3.33333	5.33333	3	6	108.75	1877.45	Rust
27	M 28-2	A. hypogaea	EMS mutant of Valencia 1 (VL 1)	Valencia	3	6.33333	4	6	118	1093.96	LLS
28	ICGV 02411	A. cardenasii	((((CS 29/1-B2-B1) x ((ICGS 44 x TG 2E) F2-B1-B2-B1)) F2-B2-B1-B1-B2-B1-B1-B1) x ((JL 24 x CG 2187) F2-P10-B1-B1-B1-B1-B1-B1)) F2-P17-B2-B1-B2-P4-B1-B1-B1-B1-B1	Spanish Bunch	2.66667	4.33333	2.33333	4	130.63	2561.59	LLS and Rust
29	ICGV 05155	A. cardenasii	(((((((F 334 A-B-14 x NC Ac 2214) F2-B1-B3-B2-B3-B2-B3) x ICG 2241) F2-B3-B1-B1-B2SB-B1SB-B2-B1SB) x ((ICGMS 42 x Kadiri 3) F2-B1-B2-B2-B2-B1-B1-B1)) F2-SSD-B3NI-B1-B1-P2-B1-B1) x ((((FESR 13-P14-B1-B2-B1-B1 x Chico) F2-B3-B1-B3-B1-B1-B1) x ((CS 9 x ICGS 5) F2-B1-B2-B2-B1)) F2-P29-B1-B1-B1-B1-B1-B1-B1)) F2-B3-P5-B1-B3-B2-B1-B1-B1-B3-B1	Spanish Bunch	3.66667	5.66667	2.33333	4.66667	115.25	2952.5	Rust
30	ICG 6022	A. hypogaea	NCAC 927; PI 162859	Valencia	3	5.66667	3.66667	5.66667	116.25	1138.38	LLS
31	ICG 8751	A. hypogaea	Advanced/Improved cultivar	Unknown	4.66667	6.66667	3	6	117.38	1655.73	Rust
32	ICGV 01276	A. cardenasii	(((((ICGS 35 x NC Ac 1705) F2-B2-B1-B1-B3-B2) x (CS 16-B2-B2)) F2-B4-P1-B1-B1VB-B3VB-B1-B1VB) x ((NC Ac 343 x ((Dh. 3-20 x Robut 33-1) F2-P5-B1-B1-EB2-B1-B1-B1-B1-B1-B1-B1)) F2-B2-B1-B1-B1-B1-B1-B2-B1)) F2-SSD-B3-B1-B2-B3-B1-B1-B1-B2-B3-B1	Spanish Bunch	3.66667	6	2.66667	5.33333	129.5	2923.79	Rust
33	ICGV 01328	A. cardenasii	(259-2 x ([(J 11 x CS 52) x ((ICGS 44 x TG 2E) F2-B1-B2-B1)] F2-B1-B1-B1-B2-B1-B1)) F2-P30-B1-B1-P1-B1-B1-B1-B1	Spanish Bunch	2.66667	4.66667	4	5.33333	129	1750.67	LLS
34	ICGV 86590	A. hypogaea	(X14-4-B-19-B x PI 259747) F2-B2-B1-B1-B1-B1-B2	Spanish Bunch	3.66667	5.33333	3	4.33333	120.75	1541.32	Rust
35	ICGV 01464	A. hypogaea	[((Chalimbana x ((ICG 5996 x ICGS 21) F2-B2-B3-B2-B2)) F2-B1-B1-B1-B1-B2-B2-B1) x (LY x ((((((TG 17 x NC Ac 2785) F2-B2-B1-B1-B1-NIB2-B1-B1-B2-B1-B1-B1-B1) x ((Ah 114 x NC Ac 1107) F2-B1-B1-B1-B1-B1-B1-B1-B1)) F2-B2-B2-B3-B3 (Tan seed)) x ((((Ah 114 x NC Ac 1107) F2-B1-B1-B1-B1-B1-B1-B1-B1) x ICG 5286) F2-B2-B2-B2-B2)) F2-B2-B1-B1-B2-B1-B1))F1] F2-SSD-B1-B1-B1-B1-B1-B1-B1-B1	Virginia Bunch	4.66667	6.66667	2.66667	4.66667	132.88	1243.33	Rust
36	ICGV 00346	A. hypogaea	(((ICGS 5 x C 166) F2-B1-B1-B2-B1-B1-B1) x ((((72-R x Chico) F2-P1-B1-NIB1-B1-B1-NIB1-B1-B1-B1-B1-B1) x ((Ah 65 x NC Ac 17090) F2-B1-B1-B2-B1-B1-B1-B2)) F2-P10-B1-B1-B1-B1-B1-B1-B1-B1-B1)) F2-P41-B1-B1-B1-B1-B1-B1-B1-B1-B1(SB)	Spanish Bunch	4	6	2.66667	4.33333	119.63	1986.23	Rust
37	ICGV 00362	A. hypogaea	(((ICGS 5 x C 166) F2-B1-B1-B2-B1-B1-B1) x ICGV 02242) F2-P43-B1-B1-B1-B1-B1-B1-B1-B1-B1(SB)	Spanish Bunch	3	5	2.33333	3.33333	119.13	1470.16	LLS and Rust
38	ICGV 02317	A. hypogaea	((((ICGS 11 x ICG 4790) F3-SSD-B2) x JL 24)-P30 x JL 24) F2-P49-B1-B1-B1-B1-B1-B1-B1-B1-B1-B1-B1-B1-B1	Virginia Bunch	4	5.66667	3	5	121.38	1944.69	Rust
39	ICGV 99051	A. cardenasii	((((CS 29/1-B2-B1) x (((Robut 33-1-1-5 B1-B1-B1-B1-B1-B1-B1-B1-B1-B1)x TG 2E) F2-B1-B2-B1)) F2-B2-B1-B1-B2-B1-B1-B1) x ((JL 24 x CG 2187) F2-P10-B1-B1-B1-B1-B1-B1)) F2-P15-B1-B1-B1	Virginia Bunch	2.66667	4.66667	2.33333	4	131.88	1839.01	LLS and Rust
40	ICGV 99052	A. cardenasii	((((CS 29/1-B2-B1) x (((Robut 33-1-1-5 B1-B1-B1-B1-B1-B1-B1-B1-B1-B1)x TG 2E) F2-B1-B2-B1)) F2-B2-B1-B1-B2-B1-B1-B1) x ((JL 24 x CG 2187) F2-P10-B1-B1-B1-B1-B1-B1)) F2-P15-B2-B1-B1	Virginia Bunch	3	3.66667	2	3.66667	132.13	1821.79	LLS and Rust
41	ICGV 00246	A. cardenasii	((((CS 29/1-B2-B1) x ((ICGS 44 x TG 2E) F2-B1-B2-B1)) F2-B2-B1-B1-B2-B1-B1-B1) x ((JL 24 x CG 2187) F2-P10-B1-B1-B1-B1-B1-B1)) F2-P6-B1-B1-B2-B1-B1(VB)	Virginia Bunch	2.66667	4	2.33333	3.33333	132.5	1315.82	LLS and Rust
42	ICGV 00248	A. cardenasii	((((CS 29/1-B2-B1) x ((ICGS 44 x TG 2E) F2-B1-B2-B1)) F2-B2-B1-B1-B2-B1-B1-B1) x ((JL 24 x CG 2187) F2-P10-B1-B1-B1-B1-B1-B1)) F2-P10-B1-B1-B1-B1-B1(VB)	Virginia Bunch	2.33333	4	2.33333	3.66667	131.88	1818.9	LLS and Rust
43	ICGV 01361	A. cardenasii	((((CS 29/1-B2-B1) x ((ICGS 44 x TG 2E) F2-B1-B2-B1)) F2-B2-B1-B1-B2-B1-B1-B1) x ((([(Shulamit x Chico) x PI 337409] F2-B2-B1-B2-B1-B1-B1-B1) x Simputangkong) F2-B1-P1-P1-B1-B1-B1)) F2-P11-B1-B1-B1-B2-B1-B1-B1	Virginia Bunch	3.33333	4.66667	2.33333	4	131.88	2326.39	Rust
44	ICGV 04087	A. cardenasii	((((CS 29/1-B2-B1) x ((ICGS 44 x TG 2E) F2-B1-B2-B1)) F2-B2-B1-B1-B2-B1-B1-B1) x ((([ICGS 30 x (TMV 10 x Chico) F6] P23-B1-B1-B1) x ([(Shulamit x Chico) x PI 337409] F2-B2-B1-B2-B1-B1-B1-B1)) F2-B1-B1-B1-B2-B1-B1)) F2-P30-B1-B1-B1-P5-B1-B1-B2-B1-B1-B1-B1-B1	Virginia Bunch	3	5	2.66667	3.33333	131.75	2145.94	LLS and Rust
45	ICGV 06175	A. cardenasii	((((((CS 29/1-B2-B1) x ((ICGS 44 x TG 2E) F2-B1-B2-B1)) F2-B2-B1-B1-B2-B1-B1-B1) x ((JL 24 x CG 2187) F2-P10-B1-B1-B1-B1-B1-B1)) F2-P15-B2-B1-B1) x (((((CS 29/1-B2-B1) x ((ICGS 44 x TG 2E) F2-B1-B2-B1)) F2-B2-B1-B1-B2-B1-B1-B1) x ((([ICGS 30 x (TMV 10 x Chico) F6] P23-B1-B1-B1) x ([(Shulamit x Chico) x PI 337409] F2-B2-B1-B2-B1-B1-B1-B1)) F2-B1-B1-B1-B2-B1-B1)) F2-P30-B1-B2-B1-P2-B1(VB))) F2-B1-S…	Virginia Bunch	4	5.66667	3	4.66667	123.63	1316.59	Rust
46	ICGV 97128	A. hypogaea	[((TMV 10 x Chico) F2-B2-NIB1-B1-B1-B1-B1-B1-B1-B1-B1-B1)x (B4 x ((Tifspan x Robut 33-1) F2E-B1-B1-B1-B1-B1-B1-B1))] F2-SSD-B1-P1-P1-B3-B1	Virginia Bunch	4	6	2.66667	4.33333	131.88	2122.21	Rust
47	ICGV 00068	A. cardenasii	(((((ICGS 35 x NC Ac 1705) F2-B2-B1-B1-B3-B2) x (CS 16-B2-B2)) F2-B4-P1-B1-B1VB-B3VB-B1-B1VB) x ((((Robut 33-1 x L.No. 95-A) F2-B1-B1-B1-B1-B1-B1-B1) x ((Manfredi x M 13))) F2-SSD-SSD-P3-B1-B1-B3-B1-B1)) F2-SSD-SSD-B2-B1-B1(VB)	Virginia Bunch	2.66667	4	2.66667	4	131.63	1713.66	LLS and Rust
48	ICGV 05057	A. hypogaea	{[((ICGS 44 x TG 2E) F2-B1-B2-B1) x (B4 x ICGMS 2)] x (((((F 334 A-B-14 x NC Ac 2214) F2-B1-B3-B2-B3-B2-B3) x ICG 2241) F2-B3-B1-B1-B2SB-B1SB-B2-B1SB) x ((ICGMS 42 x Kadiri 3) F2-B1-B2-B2-B2-B1-B1-B1))} F2-SSD-SSD-B1-B1-B1-B1-B1-B1-B1-B2	Virginia Bunch	4	5.66667	2.66667	4.33333	131.25	1972.95	Rust
49	ICGV 01265	A. cardenasii	(((((Dh. 3-20 x Robut 33-1) F2-P5-B1-B1-EB2-B1-B1-B1-B1-B1-B1-B1) x ((Robut 33-1 x CS 9) F2-B2-B1-B1-B1)) F2-SSD-B3-P4-B1-B1-B1) x ((([JL 24 x (Robut 33-1 x NC Ac 2821) F8] P3-B1-B1-B1) x Chico) 23-B1-B1-B1-B1-B1)) F2-SSD-SSD-B4-B1-B1-B1	Virginia Bunch	4	5	2.66667	5.33333	120.5	1509.14	Rust
50	ICGV 98105	A. hypogaea	(((((F 334 A-B-14 x NC Ac 2214) F2-B1-B3-B2-B3-B2-B3) x ICG 2241) F2-B3-B1-B1-B2SB-B1SB-B2-B1SB) x ((((USA 40 x TMV 10) F2-P3-B1-B1-B1-B1-B1-B1-B1-B1)x Kadiri 3) F2-B1-B2-B2-B2-B1-B1-B1)) F2-SSD-B3(NI)-B2-B1-B1	Spanish Bunch	3.66667	5.33333	3	5.66667	131.38	2360.01	Rust
51	ICGV 99160	A. hypogaea	(((((F 334 A-B-14 x NC Ac 2214) F2-B1-B3-B2-B3-B2-B3) x ICG 2241) F2-B3-B1-B1-B2SB-B1SB-B2-B1SB) x ((((USA 40 x TMV 10) F2-P3-B1-B1-B1-B1-B1-B1-B1-B1)x Kadiri 3) F2-B1-B2-B2-B2-B1-B1-B1)) F2-SSD-B3NI-B1-B1-P2-B1-B1	Spanish Bunch	3	5	2.33333	4.66667	132.25	2075.05	LLS and Rust
52	ICGV 02323	A. cardenasii	(((((ICGS 35 x NC Ac 1705) F2-B2-B1-B1-B3-B2) x (CS 16-B2-B2)) F2-B4-P1-B1-B1VB-B3VB-B1-B1VB) x ((NC Ac 343 x ((Dh. 3-20 x Robut 33-1) F2-P5-B1-B1-EB2-B1-B1-B1-B1-B1-B1-B1)) F2-B2-B1-B1-B1-B1-B1-B2-B1)) F2-SSD-B3-B1-B2-B3-B1-B1-B1-B2-B1-B2-B2-B1	Spanish Bunch	3	5	2.33333	4.66667	133	2620.65	LLS and Rust
53	ICGV 05036	A. cardenasii	(((((((F 334 A-B-14 x NC Ac 2214) F2-B1-B3-B2-B3-B2-B3) x ICG 2241) F2-B3-B1-B1-B2SB-B1SB-B2-B1SB) x ((ICGMS 42 x Kadiri 3) F2-B1-B2-B2-B2-B1-B1-B1)) F2-SSD-B3(NI)-B2-B1-B1) x ((((((M 13 x NC Ac 2214) F2-B2-B3-B2-B3-B2) x ((F 334 A-B-14 x NC Ac 2214) F2-B1-B3-B2-B3-B2-B3)) F2-B1-B2-B3-B2-B6-B1) x ((A. hypogaea x A. cardenasii) CS 9)) F2-B1-B1-B1-B1-B2-B1-B1-B1-B1-B1(SB))) F2-SSD-B1-B1-B1-B1-B1-B3	Spanish Bunch	2.66667	5.33333	2.66667	4	131.5	2277.03	LLS and Rust
54	ICGV 87846	A. cardenasii	(CS 9 x ((Robut 33-1 x NC Ac 316) F2-B2-B1-B1-NIB1-B1-B1-B1-B1-B1-B1-B1)) F2-B1-B2-B2-B1	Spanish Bunch	3.66667	4.66667	2.33333	3.33333	132.13	2041.45	Rust
55	ICGV 86699	A. cardenasii	CS 29/1-B2-B1	Virginia Bunch	2	4	2.33333	4	114.13	1010.06	LLS and Rust
56	ICGV 98373	A. cardenasii	(((CS 34 x PI 393527B) F2-B1-B2-B1-B2-B1-B1-B1) x TAG 24) F2-P6-B1-B1-B1	Spanish Bunch	4.66667	6.66667	3	5	128	1523	Rust
57	CS 39	A. cardenasii	ICGV 86002	Virginia Bunch	4	7	3	6.33333	124.63	2174.62	Rust
58	ICGV 05032	A. cardenasii	[(((CS 39 x ((Dh. 3-20 x Robut 33-1) F2-P5-B1-B1-EB2-B1-B1-B1-B1-B1-B1-B1)) F2-B1-B1-B2-B1-B1-B1-B1-B1) x ((((FSB 7-2 x G 201) F2-B1-B1-B2-B1-B1-B1) x ((Ah 65 x Robut 33-1) F2-B1-NIB1-B1-B2-B1-B1-B1-B1-B1-B1-B1)) F2-B1-B1-B1-B1-B2-B1-B1)) x ((([ICGS 30 x (TMV 10 x Chico)] F2-B1-B2-B3-B1-B1-B1-B1-B1-B1-B1-P1-B2-B1-B1) x (CS 29/1-B2-B1)) F2-B1-SSD-B1-B3-B1-B1-B1-B2-B1-B1)] F2-SSD-B1-B2-B1-B1-B1-B2	Spanish Bunch	3.33333	5.33333	2.33333	3.33333	131.75	2429.41	Rust
59	ICGV 05141	A. cardenasii	{{[(Robut 33-1 x NC Ac 316) F12 x (Robut 33-1 x CS 9) F6] x ((((Robut 33-1 x NC Ac 2214) F2-B1-B2-B3-B3) x Cyto 213-2) F2-B3-B1-B1-B1-B1-B1)} x ((((((F 334 A-B-14 x NC Ac 2214) F2-B1-B3-B2-B3-B2-B3) x ICG 2241) F2-B3-B1-B1-B2SB-B1SB-B2-B1SB) x ((ICGMS 42 x Kadiri 3) F2-B1-B2-B2-B2-B1-B1-B1)) F2-SSD-B3NI-B1-B1-P2-B1-B1)} F2-SSD-B1-B1-B1-B2-B1	Virginia Bunch	2.66667	4.33333	2.66667	3.66667	130.88	2163.21	LLS and Rust
60	ICG 11337	A. cardenasii	CS 46	Spanish Bunch	2.66667	4.66667	2.66667	4.66667	131.38	815.84	LLS and Rust
61	49 M- 1-1	A. hypogaea	TG 49 × M 28-2	Virginia Bunch	3	5.66667	2.66667	5	130.88	1150.04	LLS and Rust
62	SPS 2	A. villosa	(Robut x A villosa) P2-B1-B2	Virginia Bunch	2.66667	4.33333	2.33333	4.33333	120.88	1394	LLS and Rust
63	SPS 7	A. villosa	(Robut x A villosa) P2-B1-B5	Virginia Bunch	3.33333	4.33333	2.33333	4	117.63	1567.2	Rust
64	SPS 8	A. villosa	(Robut x A villosa) P2-B1-B6	Virginia Bunch	2.66667	4	2.66667	4	119.75	1433.13	LLS and Rust
65	SPS 11	A. villosa	(Robut x A villosa) P2-B1-B1	Virginia Bunch	2.66667	5	2.33333	4	130.88	3129.48	LLS and Rust
66	SPS 20	A. villosa	(Robut x A villosa) P2-B1-B3	Virginia Bunch	2.33333	4.66667	2	3.33333	133.63	923.18	LLS and Rust
67	SPS 21	A. villosa	(Robut x A villosa) P2-B1-B4	Virginia Bunch	3.66667	4	2.33333	4	131.5	1046.47	Rust
68	ICG 11426	A. hypogaea	CS 2414	Virginia Bunch	3.66667	6	2.66667	4.66667	120.88	936.01	Rust
69	ICGV 02446	A. cardenasii	((((CS 29/1-B2-B1) x ((ICGS 44 x TG 2E) F2-B1-B2-B1)) F2-B2-B1-B1-B2-B1-B1-B1) x ((([ICGS 30 x (TMV 10 x Chico) F6] P23-B1-B1-B1) x ([(Shulamit x Chico) x PI 337409] F2-B2-B1-B2-B1-B1-B1-B1)) F2-B1-B1-B1-B2-B1-B1)) F2-P30-B1-B1-B1-P5-B1-B1-B1-B1-B1	Virginia Bunch	3	4.33333	2.33333	4	131.38	1405.85	LLS and Rust
Note	LLS90 & LLS105= Average disease severity score of late leaf spot recorded at 90 and 105 days after sowing, respectively and Rust90 & Rust105= Average disease severity score of rust recorded at 90 and 105 days after sowing, respectively; DM= Days to maturity at ICRISAT during rainy 2015; PYH= Pod yield per hectare across the environments
